# Supplementary material for: Bioinspired elastomer composites with programmed mechanical and electrical anisotropies
Source: PubMed Central journal article supplement (PMC8791960; doi:10.1038/s41467-022-28185-z), 2022-01-26
Supplement: 41467_2022_28185_MOESM2_ESM.pdf [file 41467_2022_28185_MOESM2_ESM.pdf]

**File Name:** Supplementary Movie 1

**Description:** Anisotropic Elastomer Composites Integrated with Heart-like Dielectric Elastomer Actuators

**File Name:** Supplementary Movie 2

**Description:** Dielectric Elastomer Actuators-Based Artificial Muscles without 3D Skeletons

**File Name:** Supplementary Movie 3

**Description:** Dielectric Elastomer Actuators-Based Artificial Muscles with 3D Skeletons
